# Supplementary material for: Iodine-doped ZnO nanopillar arrays for perovskite solar cells with high efficiency up to 18.24%
Source: Royal Society of Chemistry journal article supplement (doi:10.1039/c7ta03150e), 2017-01-01
Supplement: c7ta03150e1.pdf [file c7ta03150e1.pdf]

Supporting Information

# **Iodine-doped ZnO Nanopillar Arrays for Planar Perovskite Solar Cells with High-Efficiency up to 18.24%**

Yan-Zhen Zheng <sup>a,b,\*</sup>, Er-Fei Zhao <sup>a</sup>, Fan-Li Meng <sup>a</sup>, Xue-Sen Lai <sup>a</sup>, Xue-Mei Dong <sup>a</sup>,  
Jiao-Jiao Wu <sup>a</sup>, and Xia Tao <sup>a,\*</sup>

<sup>a</sup>State Key Laboratory of Organic-Inorganic Composites

Beijing University of Chemical Technology

15 Beisanhuan East Road, Beijing, 100029, P. R. China

\*E-mail: zhengyz@mail.buct.edu.cn, taoxia@yahoo.com

<sup>b</sup>Research Center of the Ministry of Education for High Gravity Engineering &

Technology, Beijing University of Chemical Technology

15 Beisanhuan East Road, Beijing, 100029, P. R. China

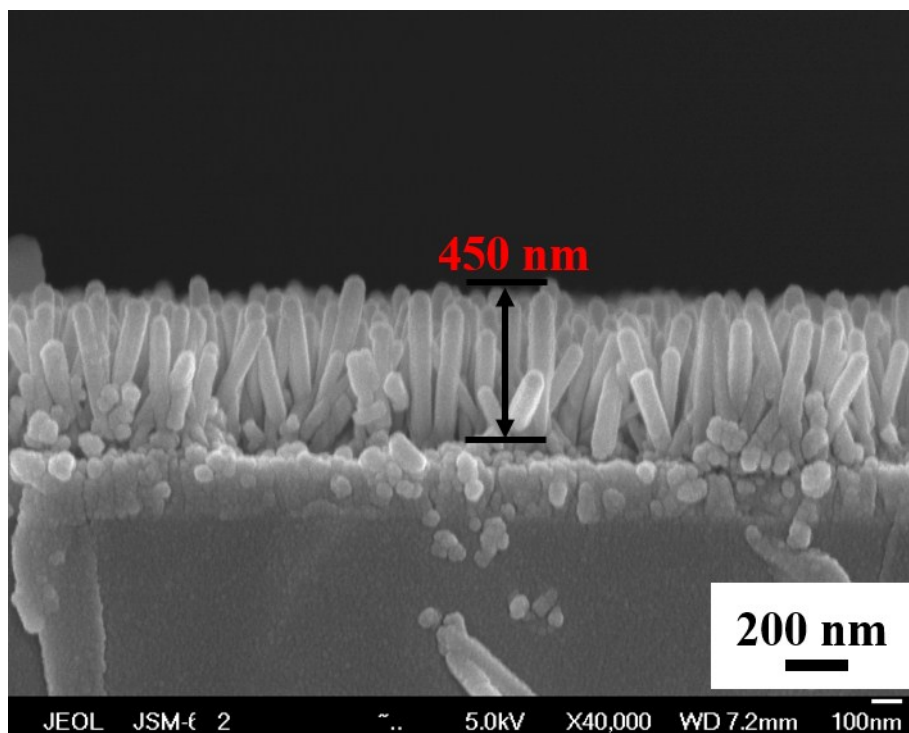

Fig. S1 Cross-sectional SEM image of ZnO NR film hydrothermally grown for 2 h.

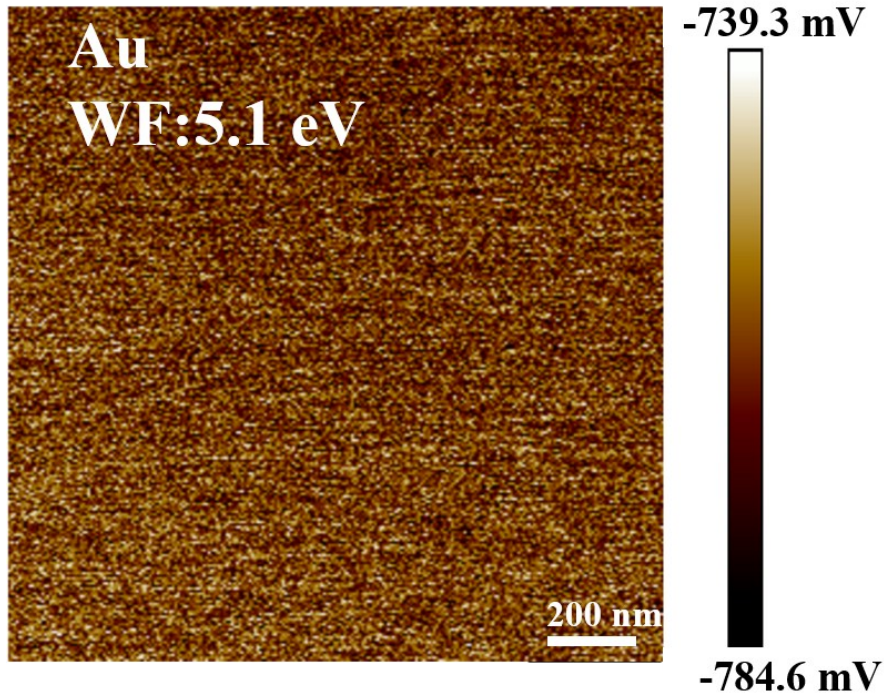

Fig. S2 Surface potential mapping of Au reference.

The work function of the ZnO NR and ZnO:I nanopillar films is measured by KPFM through probing the contact potential difference (CPD) between Antimony(n) doped Si tip and the samples. The  $WF_{\text{sample}}$  is defined as the following equation:

$$WF_{\text{Sample}} = WF_{\text{tip}} - eV_{\text{CPD}}$$

where  $e$  is the elementary charge of electron,  $WF_{\text{tip}}$  is the work function of Antimony(n) doped Si tip, and  $WF_{\text{sample}}$  is the work function of sample surface. The  $1.5 \times 1.5 \mu\text{m}^2$  scan area is measured on Au, ZnO NR and ZnO:I nanopillar films, and the mean distribution of surface potential is employed as  $V_{\text{CPD}}$ . The constant work function of Au is 5.10 eV. The  $V_{\text{CPD}}$  between Antimony(n) doped Si tip and the Au, ZnO NR and ZnO:I nanopillar films are  $-762 \text{ mV}$ ,  $-449 \text{ mV}$  and  $-368 \text{ mV}$ , respectively, as shown in Fig. 4. Therefore, the work function of the ZnO NR and ZnO:I nanopillar are 4.79 and 4.71 eV, respectively.

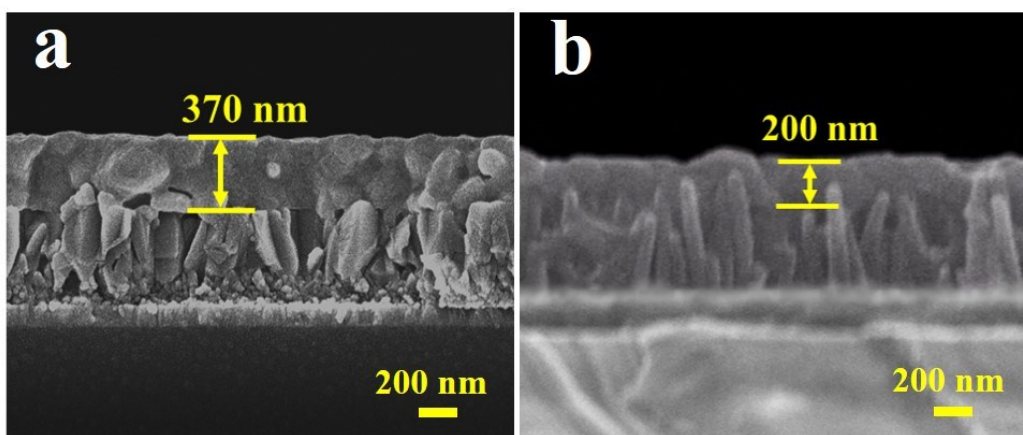

Fig. S3 Cross-sectional SEM images of perovskite deposition on the ZnO:I nanopillar (a) and ZnO NR (b) ETLs using one-step spin-coating process.

Table S1 Comprehensive comparison of 1D ETL structure, photovoltaic performance, perovskite processing method together with perovskite coverage between our work and other reported 1D ETL based PSCs .

| 1D ETL               | Length (nm) | Diameter (nm) | PCE (%) | Perovskite processing method | Perovskite coverage | Ref.     |
|----------------------|-------------|---------------|---------|------------------------------|---------------------|----------|
| ZnO:I nanopillar     | 450         | ~169          | 18.2    | One-step                     | Complete            | Our work |
| N:ZnO NRs            | 1071        | ~35           | 16.12   | Two-step                     | Complete            | 14       |
| ZnO NRs              | 1000        | ~80           | 11.13   | Two-step                     | Incomplete          | 15       |
| ZnO NRs              | 600         | ~60           | 14.35   | Two-step                     | Complete            | 16       |
| ZnO NRs              | 600         | ~50           | 5       | One-step                     | Incomplete          | 17       |
| TiO <sub>2</sub> NRs | 560         | ~80           | 9.4     | One-step                     | Incomplete          | 18       |

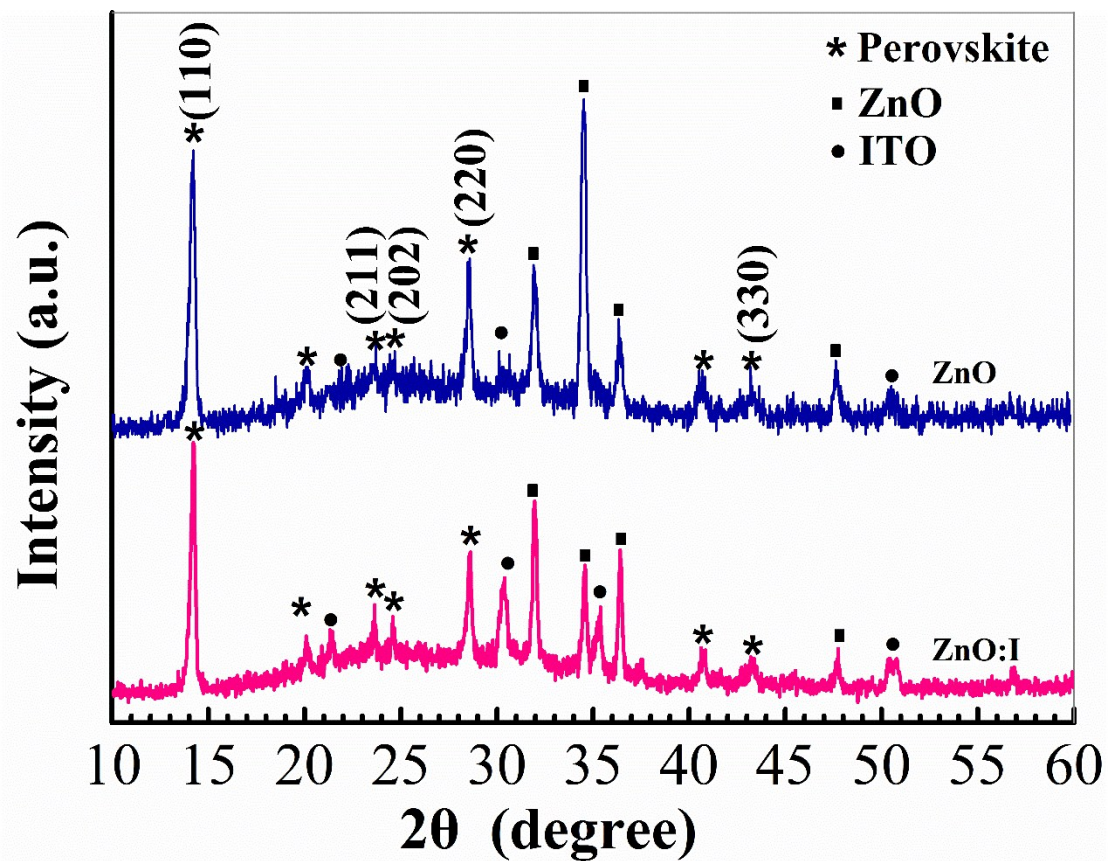

Fig. S4 XRD patterns of  $\text{CH}_3\text{NH}_3\text{PbI}_3$  films deposited on ZnO NR ETL/ITO, and ZnO:I nanopillar ETL/ITO substrates, respectively.

Table S2 Photovoltaic parameters of a batch of 30 devices with ZnO NR as ETLs measured under AM 1.5G illumination at 100 mW cm<sup>-2</sup> using reverse scan direction with a scan rate of 0.2 V s<sup>-1</sup>.

| Cell    | $V_{oc}$ (V) | $J_{sc}$ (mA/cm <sup>2</sup> ) | FF (%)     | PCE (%)   |
|---------|--------------|--------------------------------|------------|-----------|
| 1       | 1.07         | 18.04                          | 55.89      | 10.79     |
| 2       | 1.03         | 15.76                          | 53.46      | 8.68      |
| 3       | 1.07         | 17.16                          | 55.82      | 10.25     |
| 4       | 1.08         | 17.95                          | 55.42      | 10.74     |
| 5       | 1.05         | 17.79                          | 55.67      | 10.40     |
| 6       | 1.05         | 16.06                          | 53.21      | 8.97      |
| 7       | 1.06         | 17.94                          | 55.56      | 10.57     |
| 8       | 1.01         | 16.45                          | 52.02      | 8.64      |
| 9       | 1.04         | 17.31                          | 53.00      | 9.54      |
| 10      | 1.02         | 17.54                          | 54.78      | 9.80      |
| 11      | 1.00         | 16.4                           | 51.01      | 8.37      |
| 12      | 1.09         | 17.21                          | 56.14      | 10.53     |
| 13      | 1.05         | 17.97                          | 55.14      | 10.40     |
| 14      | 1.02         | 17.86                          | 54.71      | 9.97      |
| 15      | 1.00         | 16.47                          | 50.15      | 8.26      |
| 16      | 1.02         | 16.06                          | 54.95      | 9.00      |
| 17      | 1.05         | 17.86                          | 55.65      | 10.44     |
| 18      | 1.04         | 17.03                          | 55.06      | 9.75      |
| 19      | 1.03         | 17.53                          | 54.51      | 9.84      |
| 20      | 1.02         | 16.82                          | 54.11      | 9.28      |
| 21      | 1.07         | 17.61                          | 55.57      | 10.47     |
| 22      | 1.02         | 16.27                          | 53.13      | 8.82      |
| 23      | 1.03         | 17.22                          | 55.38      | 9.82      |
| 24      | 1.05         | 18.02                          | 54.31      | 10.28     |
| 25      | 1.05         | 17.80                          | 55.74      | 10.42     |
| 26      | 1.04         | 17.64                          | 54.68      | 10.03     |
| 27      | 1.02         | 17.10                          | 55.41      | 9.66      |
| 28      | 1.01         | 16.46                          | 52.26      | 8.69      |
| 29      | 1.03         | 16.83                          | 54.10      | 9.38      |
| 30      | 1.02         | 17.98                          | 55.01      | 10.09     |
| Average | 1.04±0.02    | 17.21±0.69                     | 54.40±1.51 | 9.73±0.75 |

Table S3 Photovoltaic parameters of a batch of 30 devices with ZnO:I nanopillar as ETLs measured under AM 1.5G illumination at 100 mW cm<sup>-2</sup> using reverse scan direction with a scan rate of 0.2 V s<sup>-1</sup>.

| Cell    | $V_{oc}$ (V) | $J_{sc}$ (mA/cm <sup>2</sup> ) | FF (%)     | PCE (%)    |
|---------|--------------|--------------------------------|------------|------------|
| 1       | 1.13         | 22.42                          | 71.99      | 18.24      |
| 2       | 1.14         | 22.11                          | 67.01      | 16.89      |
| 3       | 1.13         | 21.00                          | 71.33      | 16.93      |
| 4       | 1.12         | 22.17                          | 69.95      | 17.37      |
| 5       | 1.12         | 22.18                          | 71.24      | 17.70      |
| 6       | 1.10         | 21.37                          | 70.56      | 16.59      |
| 7       | 1.11         | 21.48                          | 71.23      | 16.98      |
| 8       | 1.10         | 21.53                          | 70.75      | 16.76      |
| 9       | 1.08         | 22.15                          | 71.16      | 17.02      |
| 10      | 1.09         | 21.97                          | 68.03      | 16.29      |
| 11      | 1.08         | 22.88                          | 71.75      | 17.73      |
| 12      | 1.11         | 21.99                          | 71.36      | 17.42      |
| 13      | 1.09         | 22.02                          | 68.53      | 16.45      |
| 14      | 1.09         | 22.07                          | 69.42      | 16.70      |
| 15      | 1.13         | 21.47                          | 71.36      | 17.31      |
| 16      | 1.14         | 21.63                          | 69.76      | 17.20      |
| 17      | 1.14         | 21.61                          | 67.83      | 16.71      |
| 18      | 1.07         | 22.00                          | 68.87      | 16.21      |
| 19      | 1.10         | 21.23                          | 72.37      | 16.90      |
| 20      | 1.12         | 22.21                          | 70.12      | 17.44      |
| 21      | 1.12         | 22.37                          | 71.89      | 18.01      |
| 22      | 1.08         | 22.00                          | 70.38      | 16.72      |
| 23      | 1.09         | 21.55                          | 69.05      | 16.22      |
| 24      | 1.13         | 21.6                           | 72.16      | 17.61      |
| 25      | 1.14         | 21.71                          | 70.38      | 17.42      |
| 26      | 1.13         | 21.51                          | 69.85      | 16.98      |
| 27      | 1.12         | 21.34                          | 70.72      | 16.90      |
| 28      | 1.13         | 22.07                          | 67.48      | 16.83      |
| 29      | 1.11         | 21.37                          | 70.46      | 16.71      |
| 30      | 1.12         | 21.91                          | 69.64      | 17.09      |
| Average | 1.11±0.02    | 21.83±0.41                     | 70.22±1.44 | 17.04±0.50 |

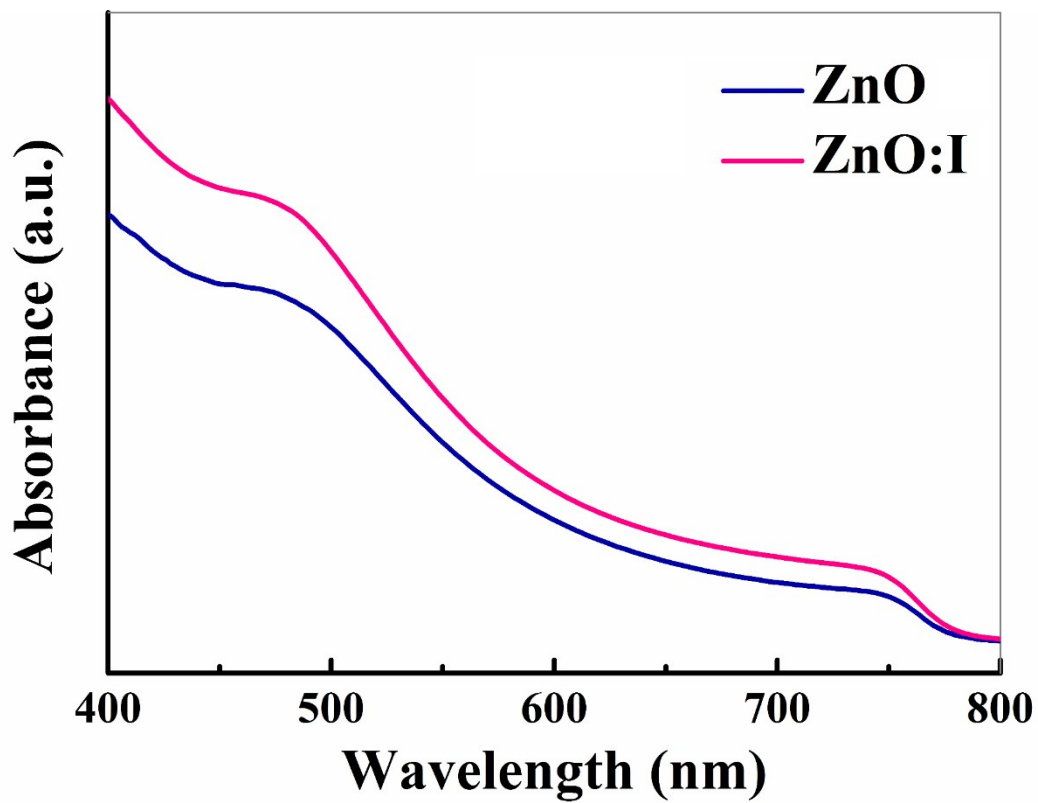

Fig. S5 UV-vis absorption spectra of  $\text{CH}_3\text{NH}_3\text{PbI}_3$  films deposited on ZnO NR ETL/ITO, and ZnO:I nanopillar ETL/ITO substrates, respectively.



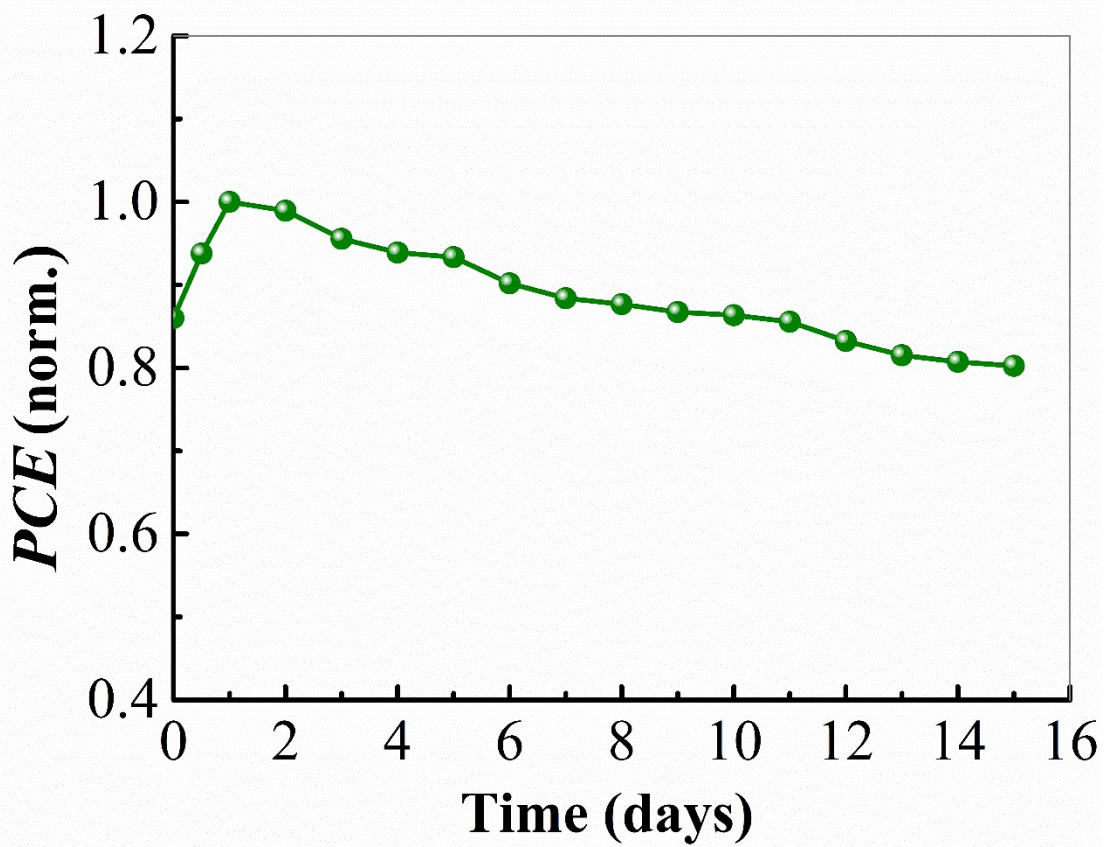

Fig. S6 Long term stability testing results for the unsealed PSC device based on ZnO:I nanopillar ETL.
